# Supplementary material for: Research trends and hotspots on connectomes from 2005 to 2021: A bibliometric and latent Dirichlet allocation application study
Source: Frontiers journal article supplement (doi:10.3389/fnins.2022.1046562), 2022-12-22
Supplement: Data_Sheet_1.pdf [file Data_Sheet_1.pdf]

# Supplementary materials for “Research Trends and Hotspots on Connectomes from 2005 to 2021: A Bibliometric and Latent Dirichlet Allocation Application Study”

Suppl.table 1. The main information of publications in connectomes

| <b>MAIN INFORMATION ABOUT DATA</b> |           |
|------------------------------------|-----------|
| Timespan                           | 2005:2021 |
| Sources (Journals, Books, etc)     | 1357      |
| Documents                          | 14140     |
| Annual Growth Rate %               | 53.59     |
| Document Average Age               | 4.67      |
| Average citations per doc          | 36.91     |
| References                         | 684805    |
| <b>DOCUMENT CONTENTS</b>           |           |
| Keywords Plus (ID)                 | 32068     |
| Author's Keywords (DE)             | 20238     |
| <b>AUTHORS</b>                     |           |
| Authors                            | 43415     |
| Authors of single-authored docs    | 548       |
| <b>AUTHORS COLLABORATION</b>       |           |
| Single-authored docs               | 632       |
| Co-Authors per Doc                 | 6.26      |
| International co-authorships %     | 15.69     |
| <b>DOCUMENT TYPES</b>              |           |
| article                            | 12231     |
| review                             | 1909      |

Suppl.table 2. Annual production of connectome research

| Year     | 2005 | 2006 | 2007 | 2008 | 2009 | 2010 | 2011 | 2012 |      |
|----------|------|------|------|------|------|------|------|------|------|
| Articles | 2    | 2    | 4    | 9    | 10   | 30   | 69   | 134  |      |
| Year     | 2013 | 2014 | 2015 | 2016 | 2017 | 2018 | 2019 | 2020 | 2021 |
| Articles | 684  | 1259 | 1804 | 1756 | 1436 | 1538 | 1648 | 1837 | 1918 |

## Source Growth

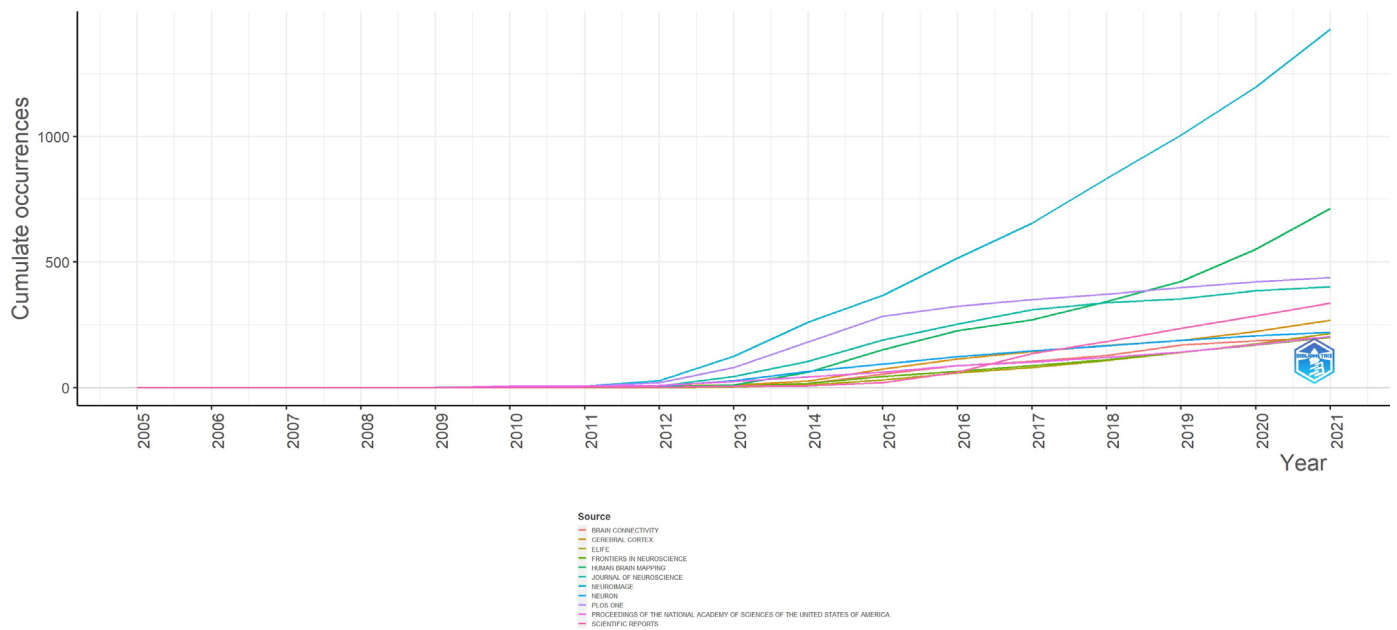

Suppl.figure 1. The annual growth trend of the top 10 productive journals

Suppl.table 3. Annual production of the top 10 productive journals from 2005 to 2021

| Year | NEUROIMAG<br>E | HUM<br>BRAIN<br>MAPP | PLOS J<br>ONE | NEUROSCI | SCI<br>REP | CEREB<br>CORTEX | NEUR<br>ON | ELIFE | PROC<br>NATL<br>ACAD<br>SCI USA | BRAIN<br>CONNECT |
|------|----------------|----------------------|---------------|----------|------------|-----------------|------------|-------|---------------------------------|------------------|
| 2005 | 0              | 0                    | 0             | 0        | 0          | 0               | 0          | 0     | 0                               | 0                |
| 2006 | 0              | 0                    | 0             | 0        | 0          | 0               | 0          | 0     | 0                               | 0                |
| 2007 | 0              | 0                    | 0             | 0        | 0          | 0               | 0          | 0     | 0                               | 0                |
| 2008 | 0              | 0                    | 0             | 0        | 0          | 0               | 0          | 0     | 0                               | 0                |
| 2009 | 0              | 0                    | 1             | 0        | 0          | 0               | 1          | 0     | 0                               | 0                |
| 2010 | 0              | 1                    | 1             | 1        | 0          | 0               | 2          | 0     | 5                               | 0                |
| 2011 | 6              | 1                    | 5             | 4        | 1          | 2               | 2          | 0     | 5                               | 3                |
| 2012 | 27             | 2                    | 19            | 5        | 1          | 7               | 6          | 0     | 9                               | 4                |
| 2013 | 125            | 11                   | 80            | 45       | 5          | 11              | 27         | 2     | 25                              | 7                |
| 2014 | 261            | 62                   | 182           | 104      | 8          | 26              | 65         | 11    | 43                              | 16               |
| 2015 | 367            | 151                  | 284           | 190      | 19         | 73              | 94         | 31    | 62                              | 53               |
| 2016 | 515            | 226                  | 324           | 253      | 61         | 114             | 123        | 58    | 87                              | 88               |
| 2017 | 655            | 270                  | 350           | 310      | 136        | 143             | 146        | 80    | 101                             | 105              |
| 2018 | 832            | 342                  | 372           | 338      | 184        | 168             | 167        | 107   | 120                             | 128              |
| 2019 | 1005           | 423                  | 398           | 354      | 236        | 188             | 188        | 140   | 141                             | 170              |
| 2020 | 1198           | 551                  | 422           | 386      | 286        | 224             | 207        | 174   | 171                             | 187              |
| 2021 | 1427           | 714                  | 439           | 402      | 337        | 268             | 220        | 216   | 203                             | 200              |

Suppl.table 4. Comprehensive features\* of the top 10 productive journals.

| Journal        | Scope                                                                                                                                                                                                                                                                                                                                                                 | average turnaround time(first decision) | Longevity  | Open Access | Publication Fee |
|----------------|-----------------------------------------------------------------------------------------------------------------------------------------------------------------------------------------------------------------------------------------------------------------------------------------------------------------------------------------------------------------------|-----------------------------------------|------------|-------------|-----------------|
| NEUROIMAGE     | NEUROIMAGE is a Journal of Brain Function provides a vehicle for communicating important advances in acquiring, analyzing, and modelling neuroimaging data and in applying these techniques to the study of structure-function and brain-behavior relationships.                                                                                                      | 5.6 weeks                               | since 1992 | yes         | \$3,450         |
| HUM BRAIN MAPP | Human Brain Mapping publishes peer-reviewed basic, clinical, technical, and theoretical research in the interdisciplinary and rapidly expanding field of human brain mapping. The journal features research derived from non-invasive brain imaging modalities used to explore the spatial and temporal organization of the neural systems supporting human behavior. | -                                       | since 1993 | yes         | \$3,300         |
| PLOS ONE       | PLOS ONE welcomes original research submissions from the natural sciences, medical research, engineering, as well as the related social sciences and humanities.                                                                                                                                                                                                      | 43 days                                 | since 2006 | yes         | \$1,805         |
| J NEUROSCI     | JNeurosci is a multidisciplinary journal that publishes papers on a broad range of topics of general interest to those working on the nervous system.                                                                                                                                                                                                                 | 32 days                                 | since 1981 | yes         | \$2,270         |
| SCI REP        | Scientific Reports is an open access journal publishing original research from across all areas of the natural sciences, psychology, medicine and engineering.                                                                                                                                                                                                        | 56 days                                 | since 2011 | yes         | \$2190          |
| CEREB CORTEX   | Cerebral Cortex publishes papers on the development, evolution, organization, plasticity, and function of the cerebral cortex, including the hippocampus. Studies with clear relevance to the cerebral cortex, such as the thalamocortical relationship or cortico-subcortical interactions, are also included.                                                       | -                                       | since 1991 | yes         | \$3450          |
| NEURON         | Neuron has established itself as one of the most influential and relied upon journals in the field of neuroscience.                                                                                                                                                                                                                                                   | 4–5 weeks                               | since 1988 | yes         | \$8,900         |

|                              |                                                                                                                                                                                                                                                                                                                                                                 |         |            |     |         |
|------------------------------|-----------------------------------------------------------------------------------------------------------------------------------------------------------------------------------------------------------------------------------------------------------------------------------------------------------------------------------------------------------------|---------|------------|-----|---------|
|                              | The editors embrace interdisciplinary strategies that integrate biophysical, cellular, developmental, and molecular approaches with a systems approach to sensory, motor, and higher-order cognitive functions. Neuron serves as one of the premier intellectual forums of the entire neuroscience community.                                                   |         |            |     |         |
| ELIFE                        | eLife is a selective journal that publishes promising research in all areas of biology and medicine.                                                                                                                                                                                                                                                            | 43 days | since 2003 | yes | \$3,000 |
| PROC NATL<br>ACAD SCI<br>USA | PNAS publishes exceptional research in all branches of the Biological, Physical, and Social Sciences. Innovation often happens at the margins, and we are particularly interested in research that crosses disciplinary bounds, answers questions with broad scientific impact, or breaks new ground.                                                           | 46 days | since 1915 | yes | \$2,595 |
| BRAIN<br>CONNECT             | Brain Connectivity is an international neuroscience journal dedicated to the publication of original research, communications, and scientific reviews concerned with all aspects of anatomical, functional, and causal connections between distinct units within the central nervous system. The journal will consider studies in both human and animal models. | -       | since 2011 | yes | \$1,250 |

\* all information obtained from the official website of each journal.

Suppl.table 5. Top 20 most cited articles (by global citations) in connectome research.

| <b>Ran<br/>king</b> | <b>Article_doi</b>               | <b>Corresponding<br/>Author</b> | <b>Global<br/>citation<br/>s</b> | <b>Journal</b>      | <b>Published<br/>year</b> |
|---------------------|----------------------------------|---------------------------------|----------------------------------|---------------------|---------------------------|
| 1                   | 10.1152/jn.00338.2011            | Yeo BTT                         | 3754                             | NEUROIMAGE          | 2011                      |
| 2                   | 10.1016/j.neuroimage.2013.05.041 | Van Essen DC                    | 2347                             | NEUROIMAGE          | 2013                      |
| 3                   | 10.1073/pnas.1602413113          | Eklund A                        | 2141                             | PLOS COMPUT<br>BIOL | 2016                      |
| 4                   | 10.1016/j.neuroimage.2013.04.127 | Glasser MF                      | 2094                             | J<br>NEUROPHYSIOL   | 2013                      |
| 5                   | 10.1073/pnas.0911855107          | Biswal BB                       | 1963                             | J NEUROSCI          | 2010                      |
| 6                   | 10.1371/journal.pone.0068910     | Xia M                           | 1918                             | NEUROIMAGE          | 2013                      |
| 7                   | 10.1089/brain.2011.0008          | Friston KJ                      | 1911                             | NATURE              | 2011                      |
| 8                   | 10.1371/journal.pcbi.0010042     | Sporns O                        | 1893                             | NAT REV<br>NEUROSCI | 2005                      |

|    |                                    |                      |      |                             |      |
|----|------------------------------------|----------------------|------|-----------------------------|------|
| 9  | 10.1038/nature18933                | Glasser MF           | 1786 | NAT NEUROSCI                | 2016 |
| 10 | 10.1038/nrn3214                    | Bullmore ET          | 1767 | PLOS ONE                    | 2012 |
| 11 | 10.1016/j.neuroimage.2011.07.044   | Van Dijk Kra         | 1710 | NEUROIMAGE                  | 2012 |
| 12 | 10.1016/j.neuroimage.2013.05.079   | Hutchison RM         | 1593 | PROC NATL<br>ACAD SCI U S A | 2013 |
| 13 | 10.1523/JNEUROSCI.3539-<br>11.2011 | Van Den Heuvel<br>MP | 1414 | TRENDS COGN<br>SCI          | 2011 |
| 14 | 10.1016/j.clinph.2015.02.001       | Rossini PM           | 1401 | NATURE                      | 2015 |
| 15 | 10.1016/j.neuroimage.2015.10.019   | Andersson JLR        | 1374 | BRAIN                       | 2016 |
| 16 | 10.1152/jn.00783.2009              | Van Dijk Kra         | 1298 | NEUROIMAGE                  | 2010 |
| 17 | 10.1038/nature13186                | Oh SW                | 1257 | NAT REV<br>NEUROSCI         | 2014 |
| 18 | 10.1038/nature12107                | Chung K              | 1250 | NEUROIMAGE                  | 2013 |
| 19 | 10.1093/brain/awt162               | Leech R              | 1249 | NEUROIMAGE                  | 2014 |
| 20 | 10.1038/nn.4135                    | Finn ES              | 1196 | BRAIN<br>CONNECTIVITY       | 2015 |

---
